# Supplementary material for: Molecular and phenotypic analysis of rodent models reveals conserved and species-specific modulators of human sarcopenia
Source: PubMed Central journal article supplement (PMC7881157; doi:10.1038/s42003-021-01723-z), 2021-02-12
Supplement: 42003_2021_1723_MOESM3_ESM.pdf [file 42003_2021_1723_MOESM3_ESM.pdf]

## **Description of Additional Supplementary Files**

**File name:** Supplementary Data 1.

**Description:** Experimental measurements in rodents underlying the graphs and charts of the study.
